# Supplementary material
Source: publisher site journal article supplement (https://www.dovepress.com/article/463121)
Supplement: Supplementary file 1 [file get_supplementary_file.php]

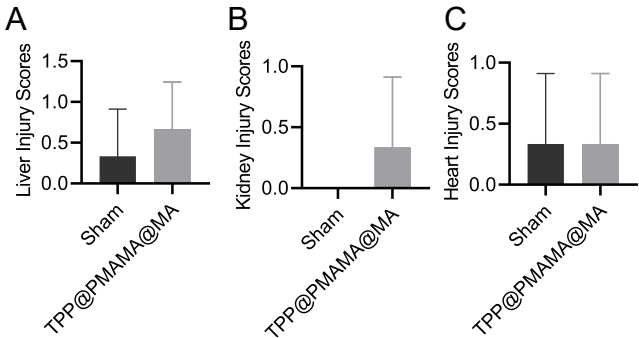

Supplementary Figure 1: (A) Liver injury scores (n=3/group). (B) Kidney injury scores (n=3/group). (C) Heart injury scores (n=3/group).
